# Supplementary material for: First DNA barcode library for the ichthyofauna of the Jos Plateau (Nigeria) with comments on potential undescribed fish species
Source: PeerJ. 2022 Apr 13;10:e13049. doi: 10.7717/peerj.13049 (PMC9013235; doi:10.7717/peerj.13049)
Supplement: Supplemental Information 13 [file peerj-10-13049-s013.xlsx]

## Sheet: Tabelle1
List of Sequenced Specimens for the project: Project - NGAJO Nigeria Jos Plateau
Data is publicly available under: https://www.boldsystems.org/index.php
Manuscript: First DNA barcode library for the ichthyofauna of the Jos Plateau (Nigeria) with comments on potential undescribed fish species.
Identification	BIN	Sample ID / accesion number	Institution Storing	Country/Ocean	COI-5P Trace
Oreochromis niloticus	BOLD:AAA6537	NGA-2014-0056	SNSB, Zoologische Staatssammlung Muenchen	Nigeria	2
Oreochromis niloticus	BOLD:AAA6537	NGA-2014-0066	SNSB, Zoologische Staatssammlung Muenchen	Nigeria	2
Enteromius sp. Si_MP	BOLD:ACR9413	NGA-2014-0068	SNSB, Zoologische Staatssammlung Muenchen	Nigeria	2
Coptodon zillii	BOLD:AAB9042	NGA-2014-0071	SNSB, Zoologische Staatssammlung Muenchen	Nigeria	2
Oreochromis niloticus	BOLD:AAA6537	NGA-2014-0074	SNSB, Zoologische Staatssammlung Muenchen	Nigeria	2
Enteromius sp. Go_MP	BOLD:ACR9412	NGA-2014-0075	SNSB, Zoologische Staatssammlung Muenchen	Nigeria	2
Clarias sp. WiDo_MP	BOLD:AAJ1105	NGA-2014-0078	SNSB, Zoologische Staatssammlung Muenchen	Nigeria	2
Clarias sp. WiDo_MP	BOLD:AAJ1105	NGA-2014-0079	SNSB, Zoologische Staatssammlung Muenchen	Nigeria	2
Clarias sp. WiDo_MP	BOLD:AAJ1105	NGA-2014-0080	SNSB, Zoologische Staatssammlung Muenchen	Nigeria	2
Enteromius sp. Si_MP	BOLD:ACR9413	NGA-2014-0085	SNSB, Zoologische Staatssammlung Muenchen	Nigeria	2
Labeo cf. parvus	BOLD:AAA4266	NGA-2014-0087	SNSB, Zoologische Staatssammlung Muenchen	Nigeria	2
Enteromius sp. Si_MP	BOLD:ACR9413	NGA-2014-0089	SNSB, Zoologische Staatssammlung Muenchen	Nigeria	2
Enteromius sp. Go_MP	BOLD:ACR9412	NGA-2014-0093	SNSB, Zoologische Staatssammlung Muenchen	Nigeria	2
Garra cf. trewavasae	BOLD:ACR9351	NGA-2014-0101	SNSB, Zoologische Staatssammlung Muenchen	Nigeria	2
Garra cf. trewavasae	BOLD:ACR9351	NGA-2014-0102	SNSB, Zoologische Staatssammlung Muenchen	Nigeria	2
Enteromius sp. Si_MP	BOLD:ACR9413	NGA-2014-0109	SNSB, Zoologische Staatssammlung Muenchen	Nigeria	2
Garra cf. trewavasae	BOLD:ACR9351	NGA-2014-0112	SNSB, Zoologische Staatssammlung Muenchen	Nigeria	2
Enteromius sp. Go_MP	BOLD:ACR9412	NGA-2014-0113	SNSB, Zoologische Staatssammlung Muenchen	Nigeria	2
Garra cf. trewavasae	BOLD:ACR9351	NGA-2014-0118	SNSB, Zoologische Staatssammlung Muenchen	Nigeria	2
Enteromius sp. Si_MP	BOLD:ACR9413	NGA-2014-0119	SNSB, Zoologische Staatssammlung Muenchen	Nigeria	2
Labeo cf. parvus	BOLD:AAA4266	NGA-2014-0123	SNSB, Zoologische Staatssammlung Muenchen	Nigeria	2
Coptodon zillii	BOLD:AAB9042	NGA-2014-0125	SNSB, Zoologische Staatssammlung Muenchen	Nigeria	2
Enteromius sp. Si_MP	BOLD:ACR9413	NGA-2014-0129	SNSB, Zoologische Staatssammlung Muenchen	Nigeria	2
Enteromius sp. Go_MP	BOLD:ACR9412	NGA-2014-0136	SNSB, Zoologische Staatssammlung Muenchen	Nigeria	2
Enteromius perince	BOLD:ACR9287	NGA-2014-0137	SNSB, Zoologische Staatssammlung Muenchen	Nigeria	2
Enteromius sp. Si_MP	BOLD:ACR9413	NGA-2014-0139	SNSB, Zoologische Staatssammlung Muenchen	Nigeria	2
Labeo cf. parvus	BOLD:AAA4266	NGA-2014-0144	SNSB, Zoologische Staatssammlung Muenchen	Nigeria	2
Labeo cf. parvus	BOLD:AAA4266	NGA-2014-0145	SNSB, Zoologische Staatssammlung Muenchen	Nigeria	2
Raiamas nigeriensis	BOLD:ACR9172	NGA-2014-0146	SNSB, Zoologische Staatssammlung Muenchen	Nigeria	2
Raiamas nigeriensis	BOLD:ACR9172	NGA-2014-0147	SNSB, Zoologische Staatssammlung Muenchen	Nigeria	2
Clarias sp. WiDo_MP	BOLD:AAJ1105	NGA-2014-0148	SNSB, Zoologische Staatssammlung Muenchen	Nigeria	2
Enteromius sp. Si_MP	BOLD:ACR9413	NGA-2014-0149	SNSB, Zoologische Staatssammlung Muenchen	Nigeria	2
Coptodon zillii	BOLD:AAB9042	NGA-2014-0150	SNSB, Zoologische Staatssammlung Muenchen	Nigeria	2
Labeo cf. parvus	BOLD:AAA4266	NGA-2014-0155	SNSB, Zoologische Staatssammlung Muenchen	Nigeria	2
Labeo cf. parvus	BOLD:AAA4266	NGA-2014-0156	SNSB, Zoologische Staatssammlung Muenchen	Nigeria	2
Enteromius sp. Si_MP	BOLD:ACR9413	NGA-2014-0160	SNSB, Zoologische Staatssammlung Muenchen	Nigeria	2
Sarotherodon galilaeus	BOLD:AAA6537	NGA-2014-0164	SNSB, Zoologische Staatssammlung Muenchen	Nigeria	2
Sarotherodon galilaeus	BOLD:AAA6537	NGA-2014-0165	SNSB, Zoologische Staatssammlung Muenchen	Nigeria	2
Enteromius perince	BOLD:ACR9287	NGA-2014-0167	SNSB, Zoologische Staatssammlung Muenchen	Nigeria	2
Enteromius perince	BOLD:ACR9287	NGA-2014-0168	SNSB, Zoologische Staatssammlung Muenchen	Nigeria	2
Coptodon zillii		NGA-2014-0170	SNSB, Zoologische Staatssammlung Muenchen	Nigeria	2
Oreochromis niloticus	BOLD:AAA6537	NGA-2014-0171	SNSB, Zoologische Staatssammlung Muenchen	Nigeria	2
Clarias sp. WiDo_MP	BOLD:AAJ1105	NGA-2014-0174	SNSB, Zoologische Staatssammlung Muenchen	Nigeria	2
Clarias sp. WiDo_MP	BOLD:AAJ1105	NGA-2014-0176	SNSB, Zoologische Staatssammlung Muenchen	Nigeria	2
Clarias sp. WiDo_MP	BOLD:AAJ1105	NGA-2014-0177	SNSB, Zoologische Staatssammlung Muenchen	Nigeria	2
Raiamas senegalensis	BOLD:ACR9171	NGA-2014-0178	SNSB, Zoologische Staatssammlung Muenchen	Nigeria	2
Raiamas senegalensis	BOLD:ACR9171	NGA-2014-0179	SNSB, Zoologische Staatssammlung Muenchen	Nigeria	2
Raiamas senegalensis	BOLD:ACR9171	NGA-2014-0183	SNSB, Zoologische Staatssammlung Muenchen	Nigeria	2
Raiamas senegalensis	BOLD:ACR9171	NGA-2014-0184	SNSB, Zoologische Staatssammlung Muenchen	Nigeria	2
Sarotherodon galilaeus	BOLD:AAA6537	NGA-2014-0185	SNSB, Zoologische Staatssammlung Muenchen	Nigeria	2
Sarotherodon galilaeus	BOLD:AAA6537	NGA-2014-0187	SNSB, Zoologische Staatssammlung Muenchen	Nigeria	2
Enteromius sp. Si_MP	BOLD:ACR9413	NGA-2014-0188	SNSB, Zoologische Staatssammlung Muenchen	Nigeria	2
Enteromius sp. Si_MP	BOLD:ACR9413	NGA-2014-0190	SNSB, Zoologische Staatssammlung Muenchen	Nigeria	2
Garra cf. trewavasae	BOLD:ACR9351	NGA-2014-0193	SNSB, Zoologische Staatssammlung Muenchen	Nigeria	2
Garra cf. trewavasae	BOLD:ACR9351	NGA-2014-0194	SNSB, Zoologische Staatssammlung Muenchen	Nigeria	2
Enteromius sp. Go_MP	BOLD:ACR9412	NGA-2014-0196	SNSB, Zoologische Staatssammlung Muenchen	Nigeria	2
Coptodon zillii	BOLD:AAB9042	NGA-2014-0200	SNSB, Zoologische Staatssammlung Muenchen	Nigeria	2
Coptodon zillii		NGA-2014-0203	SNSB, Zoologische Staatssammlung Muenchen	Nigeria	2
Coptodon zillii	BOLD:AAB9042	NGA-2014-0204	SNSB, Zoologische Staatssammlung Muenchen	Nigeria	2
Oreochromis niloticus	BOLD:AAA6537	NGA-2014-0206	SNSB, Zoologische Staatssammlung Muenchen	Nigeria	2
Coptodon zillii	BOLD:AAB9042	NGA-2014-0212	SNSB, Zoologische Staatssammlung Muenchen	Nigeria	2
Enteromius sp. Si_MP	BOLD:ACR9413	NGA-2014-0217	SNSB, Zoologische Staatssammlung Muenchen	Nigeria	2
Poecilia reticulata	BOLD:ACE3484	NGA-2014-0221	SNSB, Zoologische Staatssammlung Muenchen	Nigeria	2
Labeo cf. parvus	BOLD:AAA4266	NGA-2014-0222	SNSB, Zoologische Staatssammlung Muenchen	Nigeria	2
Labeo cf. parvus	BOLD:AAA4266	NGA-2014-0223	SNSB, Zoologische Staatssammlung Muenchen	Nigeria	2
Enteromius sp. Si_MP	BOLD:ACR9413	NGA-2014-0227	SNSB, Zoologische Staatssammlung Muenchen	Nigeria	2
Coptodon zillii	BOLD:AAB9042	NGA-2014-0230	SNSB, Zoologische Staatssammlung Muenchen	Nigeria	2
Labeo cf. parvus	BOLD:AAA4266	NGA-2014-0233	SNSB, Zoologische Staatssammlung Muenchen	Nigeria	2
Labeo cf. parvus	BOLD:AAA4266	NGA-2014-0234	SNSB, Zoologische Staatssammlung Muenchen	Nigeria	2
Garra cf. trewavasae	BOLD:ACR9351	NGA-2014-0235	SNSB, Zoologische Staatssammlung Muenchen	Nigeria	2
Enteromius sp. Si_MP	BOLD:ACR9413	NGA-2014-0239	SNSB, Zoologische Staatssammlung Muenchen	Nigeria	2
Garra cf. trewavasae	BOLD:ACR9351	NGA-2014-0241	SNSB, Zoologische Staatssammlung Muenchen	Nigeria	2
Garra cf. trewavasae	BOLD:ACR9351	NGA-2014-0242	SNSB, Zoologische Staatssammlung Muenchen	Nigeria	2
Labeo cf. parvus	BOLD:AAA4266	NGA-2014-0243	SNSB, Zoologische Staatssammlung Muenchen	Nigeria	2
Labeo cf. parvus	BOLD:AAA4266	NGA-2014-0244	SNSB, Zoologische Staatssammlung Muenchen	Nigeria	2
Labeo cf. parvus	BOLD:AAA4266	NGA-2014-0251	SNSB, Zoologische Staatssammlung Muenchen	Nigeria	2
Labeo cf. parvus	BOLD:AAA4266	NGA-2014-0252	SNSB, Zoologische Staatssammlung Muenchen	Nigeria	2
Enteromius sp. Si_MP	BOLD:ACR9413	NGA-2014-0256	SNSB, Zoologische Staatssammlung Muenchen	Nigeria	2
Garra cf. trewavasae	BOLD:ACR9351	NGA-2014-0258	SNSB, Zoologische Staatssammlung Muenchen	Nigeria	2
Heterobranchus longifilis	BOLD:AAM0293	NGA-2014-0260	SNSB, Zoologische Staatssammlung Muenchen	Nigeria	2
Raiamas senegalensis	BOLD:ACR9171	NGA-2014-0261	SNSB, Zoologische Staatssammlung Muenchen	Nigeria	2
Raiamas senegalensis	BOLD:ACR9171	NGA-2014-0262	SNSB, Zoologische Staatssammlung Muenchen	Nigeria	2
Coptodon zillii	BOLD:AAB9042	NGA-2014-0263	SNSB, Zoologische Staatssammlung Muenchen	Nigeria	2
Enteromius sp. Si_MP	BOLD:ACR9413	NGA-2014-0265	SNSB, Zoologische Staatssammlung Muenchen	Nigeria	2
Garra cf. trewavasae	BOLD:ACR9351	NGA-2014-0267	SNSB, Zoologische Staatssammlung Muenchen	Nigeria	2
Garra cf. trewavasae	BOLD:ACR9351	NGA-2014-0268	SNSB, Zoologische Staatssammlung Muenchen	Nigeria	2
Labeo sp. As_FS	BOLD:ACR9419	NGA-2014-0269	SNSB, Zoologische Staatssammlung Muenchen	Nigeria	2
Raiamas senegalensis	BOLD:ACR9171	NGA-2014-0273	SNSB, Zoologische Staatssammlung Muenchen	Nigeria	2
Garra cf. trewavasae	BOLD:ACR9351	NGA-2014-0274	SNSB, Zoologische Staatssammlung Muenchen	Nigeria	2
Enteromius sp. Si_MP	BOLD:ACR9413	NGA-2014-0275	SNSB, Zoologische Staatssammlung Muenchen	Nigeria	2
Mormyrus hasselquistii	BOLD:AAL5815	NGA-2014-0277	SNSB, Zoologische Staatssammlung Muenchen	Nigeria	2
Labeo cf. parvus	BOLD:AAA4266	NGA-2014-0278	SNSB, Zoologische Staatssammlung Muenchen	Nigeria	2
Labeo cf. parvus	BOLD:AAA4266	NGA-2014-0279	SNSB, Zoologische Staatssammlung Muenchen	Nigeria	2
Brycinus nurse	BOLD:AAI8453	NGA-2014-0280	SNSB, Zoologische Staatssammlung Muenchen	Nigeria	2
Labeobarbus cf. bynni	BOLD:ACR9402	NGA-2014-0281	SNSB, Zoologische Staatssammlung Muenchen	Nigeria	2
Oreochromis niloticus	BOLD:AAA6537	NGA-2014-0282	SNSB, Zoologische Staatssammlung Muenchen	Nigeria	2
Raiamas nigeriensis	BOLD:ACR9172	NGA-2014-0284	SNSB, Zoologische Staatssammlung Muenchen	Nigeria	2
Garra cf. trewavasae	BOLD:ACR9351	NGA-2014-0289	SNSB, Zoologische Staatssammlung Muenchen	Nigeria	2
Fundulopanchax gardneri nigerianus	BOLD:ACR9440	NGA-2014-0291	SNSB, Zoologische Staatssammlung Muenchen	Nigeria	2
Enteromius sp. Go_MP	BOLD:ACR9412	NGA-2014-0299	SNSB, Zoologische Staatssammlung Muenchen	Nigeria	2
Garra cf. trewavasae	BOLD:ACR9351	NGA-2014-0302	SNSB, Zoologische Staatssammlung Muenchen	Nigeria	2
Garra cf. trewavasae	BOLD:ACR9351	NGA-2014-0303	SNSB, Zoologische Staatssammlung Muenchen	Nigeria	2
Enteromius sp. Si_MP	BOLD:ACR9413	NGA-2014-0304	SNSB, Zoologische Staatssammlung Muenchen	Nigeria	2
Garra cf. trewavasae	BOLD:ACR9351	NGA-2014-0306	SNSB, Zoologische Staatssammlung Muenchen	Nigeria	2
Enteromius sp. Si_MP	BOLD:ACR9413	NGA-2014-0309	SNSB, Zoologische Staatssammlung Muenchen	Nigeria	2
Garra cf. trewavasae	BOLD:ACR9351	NGA-2014-0310	SNSB, Zoologische Staatssammlung Muenchen	Nigeria	2
Garra cf. trewavasae	BOLD:ACR9351	NGA-2014-0311	SNSB, Zoologische Staatssammlung Muenchen	Nigeria	2
Enteromius sp. Si_MP	BOLD:ACR9413	NGA-2014-0312	SNSB, Zoologische Staatssammlung Muenchen	Nigeria	2
Enteromius sp. Si_MP	BOLD:ACR9413	NGA-2014-0314	SNSB, Zoologische Staatssammlung Muenchen	Nigeria	2
Garra cf. trewavasae	BOLD:ACR9351	NGA-2014-0316	SNSB, Zoologische Staatssammlung Muenchen	Nigeria	2
Garra cf. trewavasae	BOLD:ACR9351	NGA-2014-0317	SNSB, Zoologische Staatssammlung Muenchen	Nigeria	2
Enteromius sp. Si_MP	BOLD:ACR9413	NGA-2014-0318	SNSB, Zoologische Staatssammlung Muenchen	Nigeria	2
Garra cf. trewavasae	BOLD:ACR9351	NGA-2014-0320	SNSB, Zoologische Staatssammlung Muenchen	Nigeria	2
Garra cf. trewavasae	BOLD:ACR9351	NGA-2014-0321	SNSB, Zoologische Staatssammlung Muenchen	Nigeria	2
Enteromius sp. Si_MP	BOLD:ACR9413	NGA-2014-0324	SNSB, Zoologische Staatssammlung Muenchen	Nigeria	2
Garra cf. trewavasae	BOLD:ACR9351	NGA-2014-0326	SNSB, Zoologische Staatssammlung Muenchen	Nigeria	2
Garra cf. trewavasae	BOLD:ACR9351	NGA-2014-0327	SNSB, Zoologische Staatssammlung Muenchen	Nigeria	2
Synodontis violaceus	BOLD:ACH7500	NGA-2014-0328	SNSB, Zoologische Staatssammlung Muenchen	Nigeria	2
Mormyrus hasselquistii	BOLD:AAL5815	NGA-2014-0329	SNSB, Zoologische Staatssammlung Muenchen	Nigeria	2
Brycinus nurse	BOLD:AAI8453	NGA-2014-0330	SNSB, Zoologische Staatssammlung Muenchen	Nigeria	2
Raiamas senegalensis	BOLD:ACR9171	NGA-2014-0331	SNSB, Zoologische Staatssammlung Muenchen	Nigeria	2
Raiamas senegalensis	BOLD:ACR9171	NGA-2014-0333	SNSB, Zoologische Staatssammlung Muenchen	Nigeria	2
Raiamas senegalensis	BOLD:ACR9171	NGA-2014-0334	SNSB, Zoologische Staatssammlung Muenchen	Nigeria	2
Labeobarbus sp. As_MP	BOLD:ACR9057	NGA-2014-0336	SNSB, Zoologische Staatssammlung Muenchen	Nigeria	2
Enteromius sp. Si_MP	BOLD:ACR9413	NGA-2014-0339	SNSB, Zoologische Staatssammlung Muenchen	Nigeria	2
Coptodon zillii	BOLD:AAB9042	NGA-2014-0346	SNSB, Zoologische Staatssammlung Muenchen	Nigeria	2
Enteromius sp. Si_MP	BOLD:ACR9413	NGA-2014-0356	SNSB, Zoologische Staatssammlung Muenchen	Nigeria	2
Fundulopanchax gardneri nigerianus	BOLD:ACR9440	NGA-2014-0358	SNSB, Zoologische Staatssammlung Muenchen	Nigeria	2
Enteromius sp. Go_MP	BOLD:ACR9412	NGA-2014-0365	SNSB, Zoologische Staatssammlung Muenchen	Nigeria	2
Garra cf. trewavasae	BOLD:ACR9351	NGA-2014-0367	SNSB, Zoologische Staatssammlung Muenchen	Nigeria	2
Garra cf. trewavasae	BOLD:ACR9351	NGA-2014-0368	SNSB, Zoologische Staatssammlung Muenchen	Nigeria	2
Labeo cf. parvus	BOLD:AAA4266	NGA-2014-0369	SNSB, Zoologische Staatssammlung Muenchen	Nigeria	2
Enteromius sp. Si_MP	BOLD:ACR9413	NGA-2014-0371	SNSB, Zoologische Staatssammlung Muenchen	Nigeria	2
Coptodon zillii	BOLD:AAB9042	NGA-2014-0373	SNSB, Zoologische Staatssammlung Muenchen	Nigeria	2
Enteromius sp. Go_MP	BOLD:ACR9412	NGA-2014-0376	SNSB, Zoologische Staatssammlung Muenchen	Nigeria	2
Fundulopanchax gardneri nigerianus	BOLD:ACR9440	NGA-2014-0379	SNSB, Zoologische Staatssammlung Muenchen	Nigeria	2
Enteromius sp. Go_MP	BOLD:ACR9412	NGA-2014-0384	SNSB, Zoologische Staatssammlung Muenchen	Nigeria	2
Enteromius sp. Si_MP	BOLD:ACR9413	NGA-2014-0385	SNSB, Zoologische Staatssammlung Muenchen	Nigeria	2
Enteromius perince	BOLD:ACR9287	NGA-2014-0388	SNSB, Zoologische Staatssammlung Muenchen	Nigeria	2
Enteromius sp. Si_MP	BOLD:ACR9413	NGA-2014-0391	SNSB, Zoologische Staatssammlung Muenchen	Nigeria	2
Oreochromis niloticus	BOLD:AAA6537	NGA-2014-0393	SNSB, Zoologische Staatssammlung Muenchen	Nigeria	2
Raiamas senegalensis	BOLD:ACR9171	NGA-2014-0394	SNSB, Zoologische Staatssammlung Muenchen	Nigeria	2
Sarotherodon galilaeus	BOLD:AAA6537	NGA-2014-0396	SNSB, Zoologische Staatssammlung Muenchen	Nigeria	2
Garra cf. trewavasae	BOLD:ACR9351	NGA-2014-0397	SNSB, Zoologische Staatssammlung Muenchen	Nigeria	2
Enteromius sp. Si_MP	BOLD:ACR9413	NGA-2014-0489	SNSB, Zoologische Staatssammlung Muenchen	Nigeria	2
Coptodon zillii	BOLD:AAB9042	NGA-2014-0494	SNSB, Zoologische Staatssammlung Muenchen	Nigeria	2
Enteromius sp. Go_MP	BOLD:ACR9412	NGA-2014-0497	SNSB, Zoologische Staatssammlung Muenchen	Nigeria	2
Enteromius sp. Go_MP	BOLD:ACR9412	NGA-2014-0503	SNSB, Zoologische Staatssammlung Muenchen	Nigeria	2
Enteromius perince	BOLD:ACR9287	NGA-2014-0506	SNSB, Zoologische Staatssammlung Muenchen	Nigeria	2
Raiamas senegalensis	BOLD:ACR9171	NGA-2014-0507	SNSB, Zoologische Staatssammlung Muenchen	Nigeria	2
Raiamas senegalensis	BOLD:ACR9171	NGA-2014-0508	SNSB, Zoologische Staatssammlung Muenchen	Nigeria	2
Raiamas nigeriensis	BOLD:ACR9172	NGA-2014-0509	SNSB, Zoologische Staatssammlung Muenchen	Nigeria	2
Enteromius sp. Si_MP	BOLD:ACR9413	NGA-2014-0510	SNSB, Zoologische Staatssammlung Muenchen	Nigeria	2
Oreochromis niloticus	BOLD:AAA6537	NGA-2014-0519	SNSB, Zoologische Staatssammlung Muenchen	Nigeria	2
Enteromius sp. Si_MP	BOLD:ACR9413	NGA-2014-0522	SNSB, Zoologische Staatssammlung Muenchen	Nigeria	2
Labeo cf. parvus	BOLD:AAA4266	NGA-2014-0523	SNSB, Zoologische Staatssammlung Muenchen	Nigeria	2
Labeo cf. parvus	BOLD:AAA4266	NGA-2014-0526	SNSB, Zoologische Staatssammlung Muenchen	Nigeria	2
Clarias sp. WiDo_MP	BOLD:AAJ1105	NGA-2014-0527	SNSB, Zoologische Staatssammlung Muenchen	Nigeria	2
Garra cf. trewavasae	BOLD:ACR9351	NGA-2014-0532	SNSB, Zoologische Staatssammlung Muenchen	Nigeria	2
Enteromius sp. Si_MP	BOLD:ACR9413	NGA-2014-0535	SNSB, Zoologische Staatssammlung Muenchen	Nigeria	2
Garra cf. trewavasae	BOLD:ACR9351	NGA-2014-0536	SNSB, Zoologische Staatssammlung Muenchen	Nigeria	2
Enteromius sp. Si_MP	BOLD:ACR9413	NGA-2014-0537	SNSB, Zoologische Staatssammlung Muenchen	Nigeria	2
Garra cf. trewavasae	BOLD:ACR9351	NGA-2014-0544	SNSB, Zoologische Staatssammlung Muenchen	Nigeria	2
Enteromius sp. Si_MP	BOLD:ACR9413	NGA-2014-0547	SNSB, Zoologische Staatssammlung Muenchen	Nigeria	2
Enteromius sp. Go_MP	BOLD:ACR9412	NGA-2014-0549	SNSB, Zoologische Staatssammlung Muenchen	Nigeria	2
Coptodon zillii	BOLD:AAB9042	NGA-2014-0553	SNSB, Zoologische Staatssammlung Muenchen	Nigeria	2
Coptodon zillii	BOLD:AAB9042	NGA-2014-0558	SNSB, Zoologische Staatssammlung Muenchen	Nigeria	2
Labeo cf. parvus	BOLD:AAA4266	NGA-2014-0561	SNSB, Zoologische Staatssammlung Muenchen	Nigeria	2
Labeo cf. parvus	BOLD:AAA4266	NGA-2014-0562	SNSB, Zoologische Staatssammlung Muenchen	Nigeria	2
Enteromius sp. Go_MP	BOLD:ACR9412	NGA-2014-0567	SNSB, Zoologische Staatssammlung Muenchen	Nigeria	2
Enteromius sp. Si_MP	BOLD:ACR9413	NGA-2014-0568	SNSB, Zoologische Staatssammlung Muenchen	Nigeria	2
Enteromius sp. Si_MP	BOLD:ACR9413	NGA-2014-0575	SNSB, Zoologische Staatssammlung Muenchen	Nigeria	2
Enteromius sp. Si_MP	BOLD:ACR9413	NGA-2014-0583	SNSB, Zoologische Staatssammlung Muenchen	Nigeria	2
Labeobarbus sp. As_MP	BOLD:ACR9057	NGA-2014-0587	SNSB, Zoologische Staatssammlung Muenchen	Nigeria	2
Coptodon zillii	BOLD:AAB9042	NGA-2014-0590	SNSB, Zoologische Staatssammlung Muenchen	Nigeria	2
Enteromius sp. Si_MP	BOLD:ACR9413	NGA-2014-0594	SNSB, Zoologische Staatssammlung Muenchen	Nigeria	2
Additional comments: In the manuscript Enteromius sp. Si_MP is referred as Enteromisu sp. Silver, Enteromius sp. Go_MP as Enteromius sp. Gold, Labeobarbus sp. As_MP as Labeoabarbus sp. Assop and Clarais sp. WiDo as Clarias sp. White dots
