# Supplementary material for: First DNA barcode library for the ichthyofauna of the Jos Plateau (Nigeria) with comments on potential undescribed fish species
Source: PeerJ journal article supplement (doi:10.7717/peerj.13049), 2022-04-13
Supplement: Supplementary_Figure8.pdf [file Supplementary_Figure8.pdf]

Neighbour joining tree based on all available CO1 (incl. data minded from GenBank) sequences on BOLD of the genus *Labeo* (1393 sequences representing 78 BINs), created in BOLD using "Taxon ID tree". Only the clusters close to *Labeo* sp. Asop are shown.

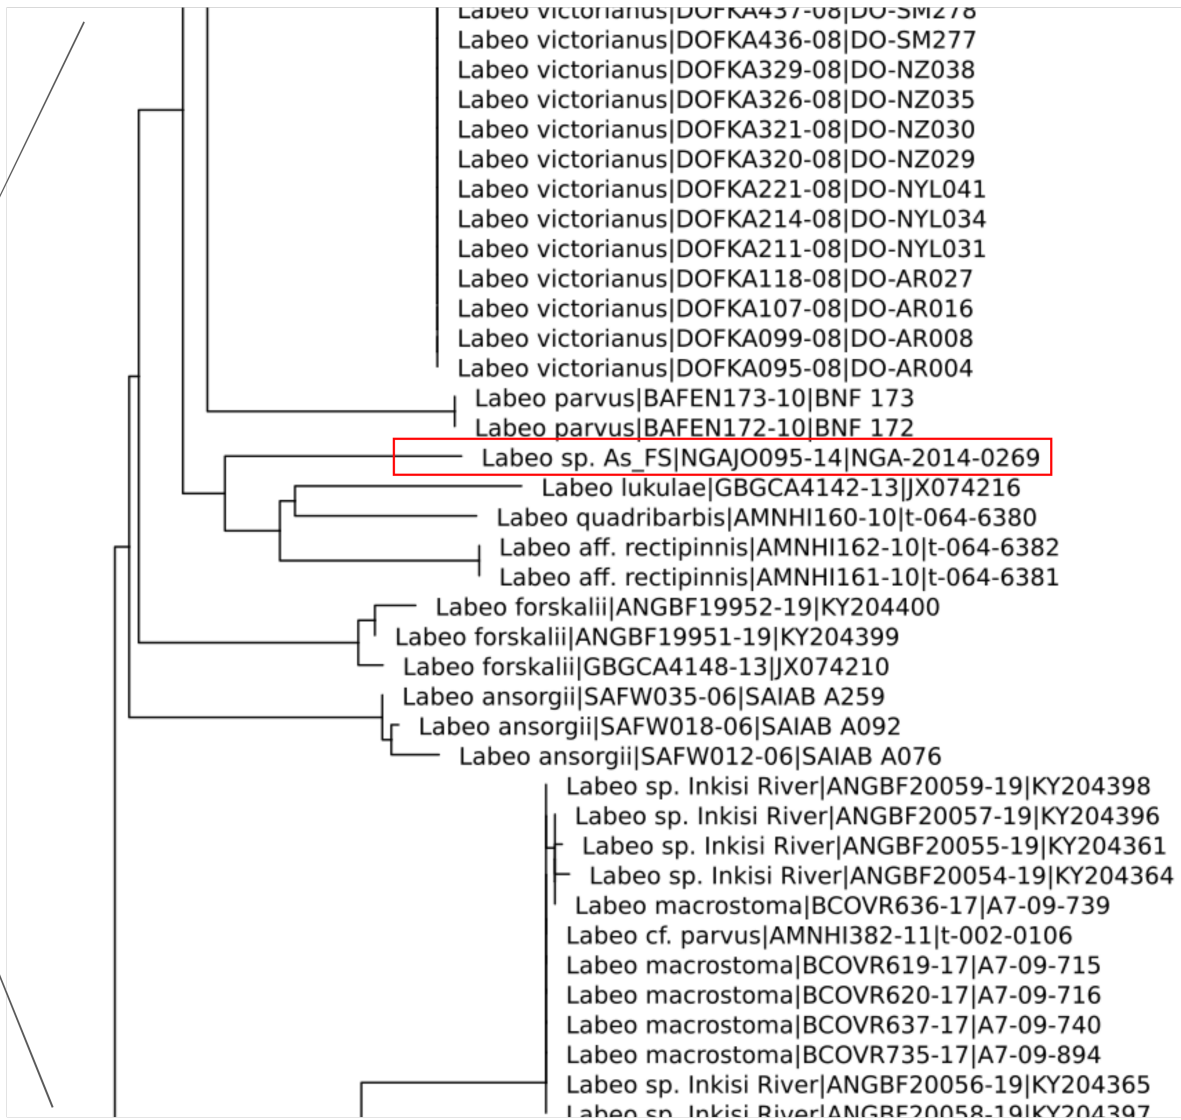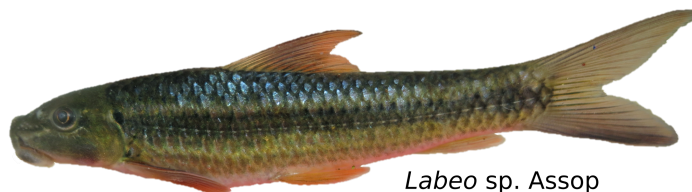

*Labeo* sp. Assop
