# Supplementary material for: First DNA barcode library for the ichthyofauna of the Jos Plateau (Nigeria) with comments on potential undescribed fish species
Source: PeerJ journal article supplement (doi:10.7717/peerj.13049), 2022-04-13
Supplement: Supplementary_Figure_6_Labeobarbus_CO1_tree_New.pdf [file Supplementary_Figure_6_Labeobarbus_CO1_tree_New.pdf]

Neighbour joining tree based on all available CO1 sequences on BOLD of the genus *Labeobarbus* (173 sequences representing 28 BINs), created in BOLD using "Taxon ID tree".

*Labeobarbus* sp. Assop

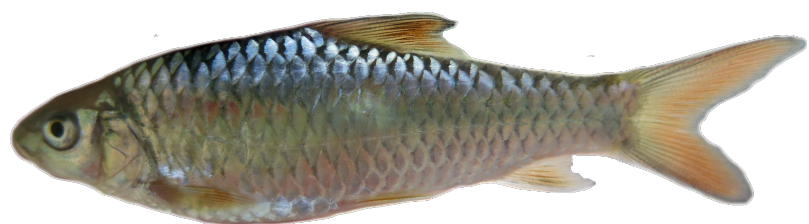

Labeobarbus altianalis|DOFKA284-08|DO-NYU019  
 Labeobarbus altianalis|DOFKA633-08|DO-SM299  
 Labeobarbus altianalis|DOFKA296-08|DO-NZ005  
 Labeobarbus altianalis|DOFKA292-08|DO-NYU027  
 Labeobarbus altianalis|DOFKA290-08|DO-NYU025  
 Labeobarbus altianalis|DOFKA289-08|DO-NYU024  
 Labeobarbus altianalis|DOFKA285-08|DO-NYU020  
 Labeobarbus altianalis|DOFKA272-08|DO-NYU007  
 Labeobarbus altianalis|DOFKA271-08|DO-NYU006  
 Labeobarbus altianalis|DOFKA586-08|DO-NYU028  
 Labeobarbus altianalis|DOFKA104-08|DO-AR013  
 Labeobarbus altianalis|DOFKA109-08|DO-AR018  
 Labeobarbus altianalis|DOFKA463-08|DO-WL011  
 Labeobarbus altianalis|DOFKA450-08|DO-SM295  
 Labeobarbus altianalis|DOFKA117-08|DO-AR026  
 Labeobarbus altianalis|DOFKA288-08|DO-NYU023  
 Labeobarbus altianalis|DOFKA273-08|DO-NYU008  
 Labeobarbus altianalis|DOFKA105-08|DO-AR014  
 Labeobarbus altianalis|DOFKA451-08|DO-SM297  
 Labeobarbus altianalis|DOFKA207-08|DO-NYL027  
 Labeobarbus altianalis|DOFKA291-08|DO-NYU026  
 Labeobarbus altianalis|DOFKA276-08|DO-NYU011  
 Labeobarbus altianalis|DOFKA266-08|DO-NYU001  
 Labeobarbus altianalis|DOFKA208-08|DO-NYL028  
 Labeobarbus altianalis|DOFKA110-08|DO-AR019  
 Labeobarbus altianalis|DOFKA448-08|DO-SM293  
 Labeobarbus altianalis|DOFKA098-08|DO-AR007  
 Labeobarbus altianalis|DOFKA108-08|DO-AR017  
 Labeobarbus altianalis|DOFKA113-08|DO-AR022  
 Labeobarbus altianalis|DOFKA206-08|DO-NYL026  
 Labeobarbus altianalis|DOFKA119-08|DO-AR028  
 Labeobarbus altianalis|DOFKA268-08|DO-NYU003  
 Labeobarbus altianalis|DOFKA295-08|DO-NZ004  
 Labeobarbus altianalis|DOFKA283-08|DO-NYU018  
 Labeobarbus altianalis|DOFKA269-08|DO-NYU004  
 Labeobarbus altianalis|DOFKA209-08|DO-NYL029  
 Labeobarbus altianalis|DOFKA210-08|DO-NYL030  
 Labeobarbus altianalis|DOFKA270-08|DO-NYU005  
 Labeobarbus altianalis|DOFKA287-08|DO-NYU022  
 Labeobarbus altianalis|DOFKA094-08|DO-AR003  
 Labeobarbus altianalis|DOFKA663-08|DO-UWL06  
 Labeobarbus altianalis|DOFKA275-08|DO-NYU010  
 Labeobarbus altianalis|DOFKA267-08|DO-NYU002  
 Labeobarbus cf. bynnij|NGAJ|0104-14|NGA-2014-0281  
 Labeobarbus intermedius|GBGCA6058-13|JQ677104  
 Labeobarbus acutirostris|GBGCA6069-13|JQ677093  
 Labeobarbus intermedius|GBGCA6064-13|JQ677098  
 Labeobarbus gorgorensis|GBGCA6067-13|JQ677095  
 Labeobarbus intermedius|GBGCA6061-13|JQ677101  
 Labeobarbus intermedius|GBGCA6059-13|JQ677103  
 Labeobarbus intermedius|intermedius|UKFBJ234-08|KUT 1443  
 Labeobarbus intermedius|ANGBF51465-19|KX419437  
 Labeobarbus surkis|GBGCA6065-13|JQ677097  
 Labeobarbus intermedius|GBGCA3113-13|JX066760  
 Labeobarbus platydorsus|GBGCA6066-13|JQ677096  
 Labeobarbus intermedius|GBGCA6060-13|JQ677102  
 Labeobarbus gorgorensis|GBGCA6068-13|JQ677094  
 Labeobarbus acutirostris|GBGCA6070-13|JQ677092  
 Labeobarbus intermedius|GBMIN98027-17|NC\_031531|07/\*  
 Labeobarbus intermedius|GBGCA6063-13|JQ677099  
 Labeobarbus intermedius|GBGCA6057-13|JQ677105  
 Labeobarbus intermedius|GBGCA6062-13|JQ677100  
 Labeobarbus intermedius|GBGCA6051-13|JQ677111  
 Labeobarbus intermedius|GBGCA6052-13|JQ677110  
 Labeobarbus intermedius|GBGCA6055-13|JQ677107  
 Labeobarbus gananensis|UKFBJ881-08|KUT 6450  
 Labeobarbus gananensis|UKFBJ882-08|KUT 6452  
 Labeobarbus intermedius|GBGCA6053-13|JQ677109  
 Labeobarbus gananensis|UKFBJ880-08|KUT 6428  
 Labeobarbus intermedius|GBGCA6047-13|JQ677115  
 Labeobarbus intermedius|GBGCA6054-13|JQ677108  
 Labeobarbus intermedius|GBGCA6048-13|JQ677114  
 Labeobarbus intermedius|GBGCA6056-13|JQ677106  
 Labeobarbus intermedius|GBGCA6050-13|JQ677112  
 Labeobarbus intermedius|GBGCA6049-13|JQ677113  
 Labeobarbus gananensis|GBGCA6043-13|JQ677119  
 Labeobarbus gananensis|GBGCA6045-13|JQ677117  
 Labeobarbus gananensis|GBGCA6046-13|JQ677116  
 Labeobarbus gananensis|GBGCA6044-13|JQ677118  
 Labeobarbus|NGAJ|0135-14|NGA-2014-0336  
 Labeobarbus|NGAJ|0188-14|NGA-2014-0587  
 Labeobarbus brevispinis|AMNHI374-10|t-062-6199  
 Labeobarbus sp.|BCOVR598-17|A7-09-685  
 Labeobarbus sp.|BCOVR600-17|A7-09-688  
 Labeobarbus sp.|BCOVR699-17|A7-09-835  
 Labeobarbus sp.|BCOVR684-17|A7-09-813  
 Labeobarbus sp.|BCOVR583-17|A7-09-663  
 Labeobarbus sp.|BCOVR582-17|A7-09-662  
 Labeobarbus sp.|BCOVR611-17|A7-09-706  
 Labeobarbus sp.|BCOVR628-17|A7-09-729  
 Labeobarbus sp.|BCOVR722-17|A7-09-878  
 Labeobarbus sp.|BCOVR721-17|A7-09-877  
 Labeobarbus sp.|BCOVR715-17|A7-09-861  
 Labeobarbus sp.|BCOVR700-17|A7-09-838  
 Labeobarbus sp.|BCOVR667-17|A7-09-782  
 Labeobarbus sp.|BCOVR622-17|A7-09-721  
 Labeobarbus sp.|BCOVR634-17|A7-09-735  
 Labeobarbus sp.|BCOVR733-17|A7-09-891  
 Labeobarbus sp.|BCOVR617-17|A7-09-713  
 Labeobarbus sp.|BCOVR629-17|A7-09-730  
 Labeobarbus sp.|BCOVR737-17|A7-09-896  
 Labeobarbus roberts|BCOVR635-17|A7-09-736  
 Labeobarbus roberts|BCOVR643-17|A7-09-750  
 Labeobarbus roberts|BCOVR633-17|A7-09-734  
 Labeobarbus caudovittatus|AMNHI240-10|t-041-4014  
 Labeobarbus caudovittatus|DCF067-15|A9\_29\_3360\_496  
 Labeobarbus caudovittatus|AMNHI063-09|t-021-2073  
 Labeobarbus caudovittatus|GBGCA3114-13|JX066759  
 Labeobarbus caudovittatus|AMNHI525-12|RM9496.1  
 Labeobarbus caudovittatus|DCF178-15|A9\_29\_3636\_515  
 Labeobarbus caudovittatus|DCF180-15|A9\_29\_3658\_520  
 Labeobarbus caudovittatus|DCF081-15|A9\_29\_3410\_40  
 Labeobarbus caudovittatus|DCF068-15|A9\_29\_3361\_497  
 Labeobarbus caudovittatus|DCF119-15|A9\_29\_3658\_171  
 Labeobarbus royllii|BCOVR221-17|A7-31-715  
 Labeobarbus royllii|BCOVR222-17|A7-31-716  
 Labeobarbus royllii|BCOVR220-17|A7-31-714  
 Labeobarbus royllii|BCOVR223-17|A7-31-717  
 Labeobarbus royllii|BCOVR224-17|A7-31-718  
 Labeobarbus sp. Lucien|GBMIN127563-17|AP011323  
 Labeobarbus compinie|BCOVR201-17|A7-31-693  
 Labeobarbus compinie|BCOVR106-17|A5-36-107  
 Labeobarbus compinie|BCOVR095-17|A7-31-650  
 Labeobarbus compinie|BCOVR159-17|A5-36-87  
 Labeobarbus caudovittatus|AMNHI079-09|t-033-3245  
 Labeobarbus sp.|SAFW487-09|SAIAB E508 B169  
 Labeobarbus sp.|SAFW612-09|SAIAB E508 B376  
 Labeobarbus sp.|SAFW613-09|SAIAB E508 B377  
 Labeobarbus sp.|SAFW507-09|SAIAB E508 B190  
 Labeobarbus sp.|SAFW597-09|SAIAB E508 B351  
 Labeobarbus sp.|BCOVR114-17|A5-36-115  
 Labeobarbus sp.|BCOVR117-17|A5-36-118  
 Labeobarbus marequensis|ANGBF20084-19|HQ236007  
 Labeobarbus marequensis|SAFW092-08|SAIAB 78431-IRB 339  
 Labeobarbus sp.|SAFW601-09|SAIAB E508 B355  
 Labeobarbus sp.|SAFW526-09|SAIAB E508 B223  
 Labeobarbus sp.|SAFW525-09|SAIAB E508 B221  
 Labeobarbus sp.|SAFW430-08|SAIAB E508 B 228  
 Labeobarbus sp.|SAFW618-09|SAIAB E508 B382  
 Labeobarbus sp.|SAFW528-09|SAIAB E508 B225  
 Labeobarbus sp.|SAFW185-08|SAIAB E507 D 043  
 Labeobarbus sp.|SAFW415-08|SAIAB E508 B 144  
 Labeobarbus sp.|SAFW429-08|SAIAB E508 B 161  
 Labeobarbus sp.|SAFW378-08|SAIAB E508 B 070  
 Labeobarbus sp.|SAFW379-08|SAIAB E508 B 071  
 Labeobarbus sp.|SAFW486-09|SAIAB E508 B168  
 Labeobarbus sp.|SAFW337-08|SAIAB E508 B 271  
 Labeobarbus sp.|SAFW551-09|SAIAB E508 B294  
 Labeobarbus sp.|SAFW480-09|SAIAB E508 B162  
 Labeobarbus sp.|SAFW329-08|SAIAB E508 B 004  
 Labeobarbus sp.|SAFW328-08|SAIAB E508 B 003  
 Labeobarbus sp.|SAFW435-08|SAIAB E508 B 236  
 Labeobarbus sp.|SAFW603-09|SAIAB E508 B357  
 Labeobarbus sp.|SAFW500-09|SAIAB E508 B183  
 Labeobarbus macrolepidotus|BCOVR657-17|A7-09-769  
 Labeobarbus macrolepidotus|BCOVR736-17|A7-09-895  
 Labeobarbus macrolepidotus|BCOVR627-17|A7-09-728  
 Labeobarbus sp.|BCOVR212-17|A7-31-706  
 Labeobarbus sp.|BCOVR225-17|A7-31-719  
 Labeobarbus sp.|BCOVR211-17|A7-31-705  
 Labeobarbus sp. Kongou|GBMNA17223-19|AP011324  
 Labeobarbus macroceps X Labeobarbus mawambiensis|DCF099-15|A9\_29\_3516\_41  
 Labeobarbus progenys|BCOVR202-17|A7-31-694  
 Labeobarbus progenys|BCOVR242-17|A7-31-740  
 Labeobarbus mawambiensis X Labeobarbus longidorsalis|DCF098-15|A9\_29\_3507\_39  
 Labeobarbus mawambiensis X Labeobarbus longidorsalis|DCF039-15|A9\_29\_3202\_153  
 Labeobarbus mawambiensis X Labeobarbus longidorsalis|DCF040-15|A9\_29\_3203\_154  
 Labeobarbus mawambiensis X Labeobarbus longidorsalis|DCF130-15|A9\_29\_3692\_180  
 Labeobarbus caudovittatus|AMNHI078-09|t-033-3240  
 Labeobarbus marocana|FFMBH1459-14|Ex22B6  
 Labeobarbus marocana|FFMBH1491-14|Ex22E3  
 Labeobarbus habereri|AMNHI371-10|t-062-6161  
 Labeobarbus intermedius|intermedius|UKFBJ859-08|KUT 6090
