# Supplementary material for: First DNA barcode library for the ichthyofauna of the Jos Plateau (Nigeria) with comments on potential undescribed fish species
Source: PeerJ journal article supplement (doi:10.7717/peerj.13049), 2022-04-13
Supplement: Supplementary_Figure_7_Clarias_CO1_tree.pdf [file Supplementary_Figure_7_Clarias_CO1_tree.pdf]

Neighbour joining tree based on all available CO1 sequences on BOLD of the genus *Clarias* (526 sequences representing 35 BINs), created in BOLD using “Taxon ID tree” tool and using Kaling (Lassmann and Sonnhammer, 2005).

*Clarias* sp. White dots

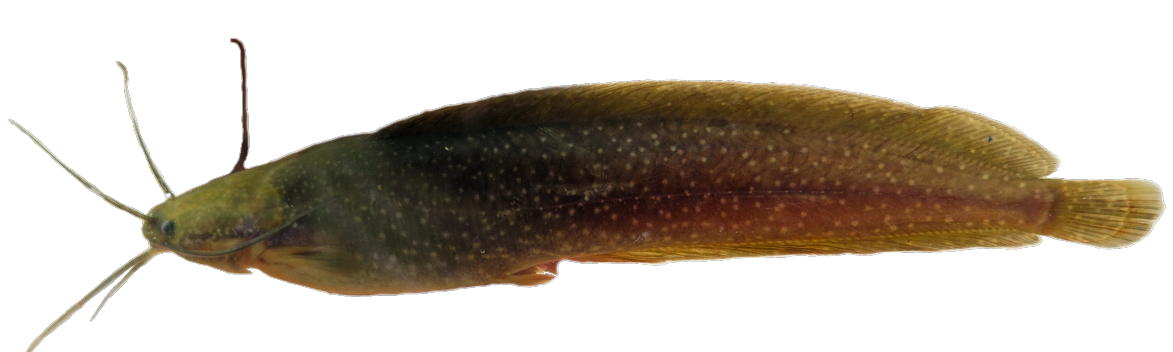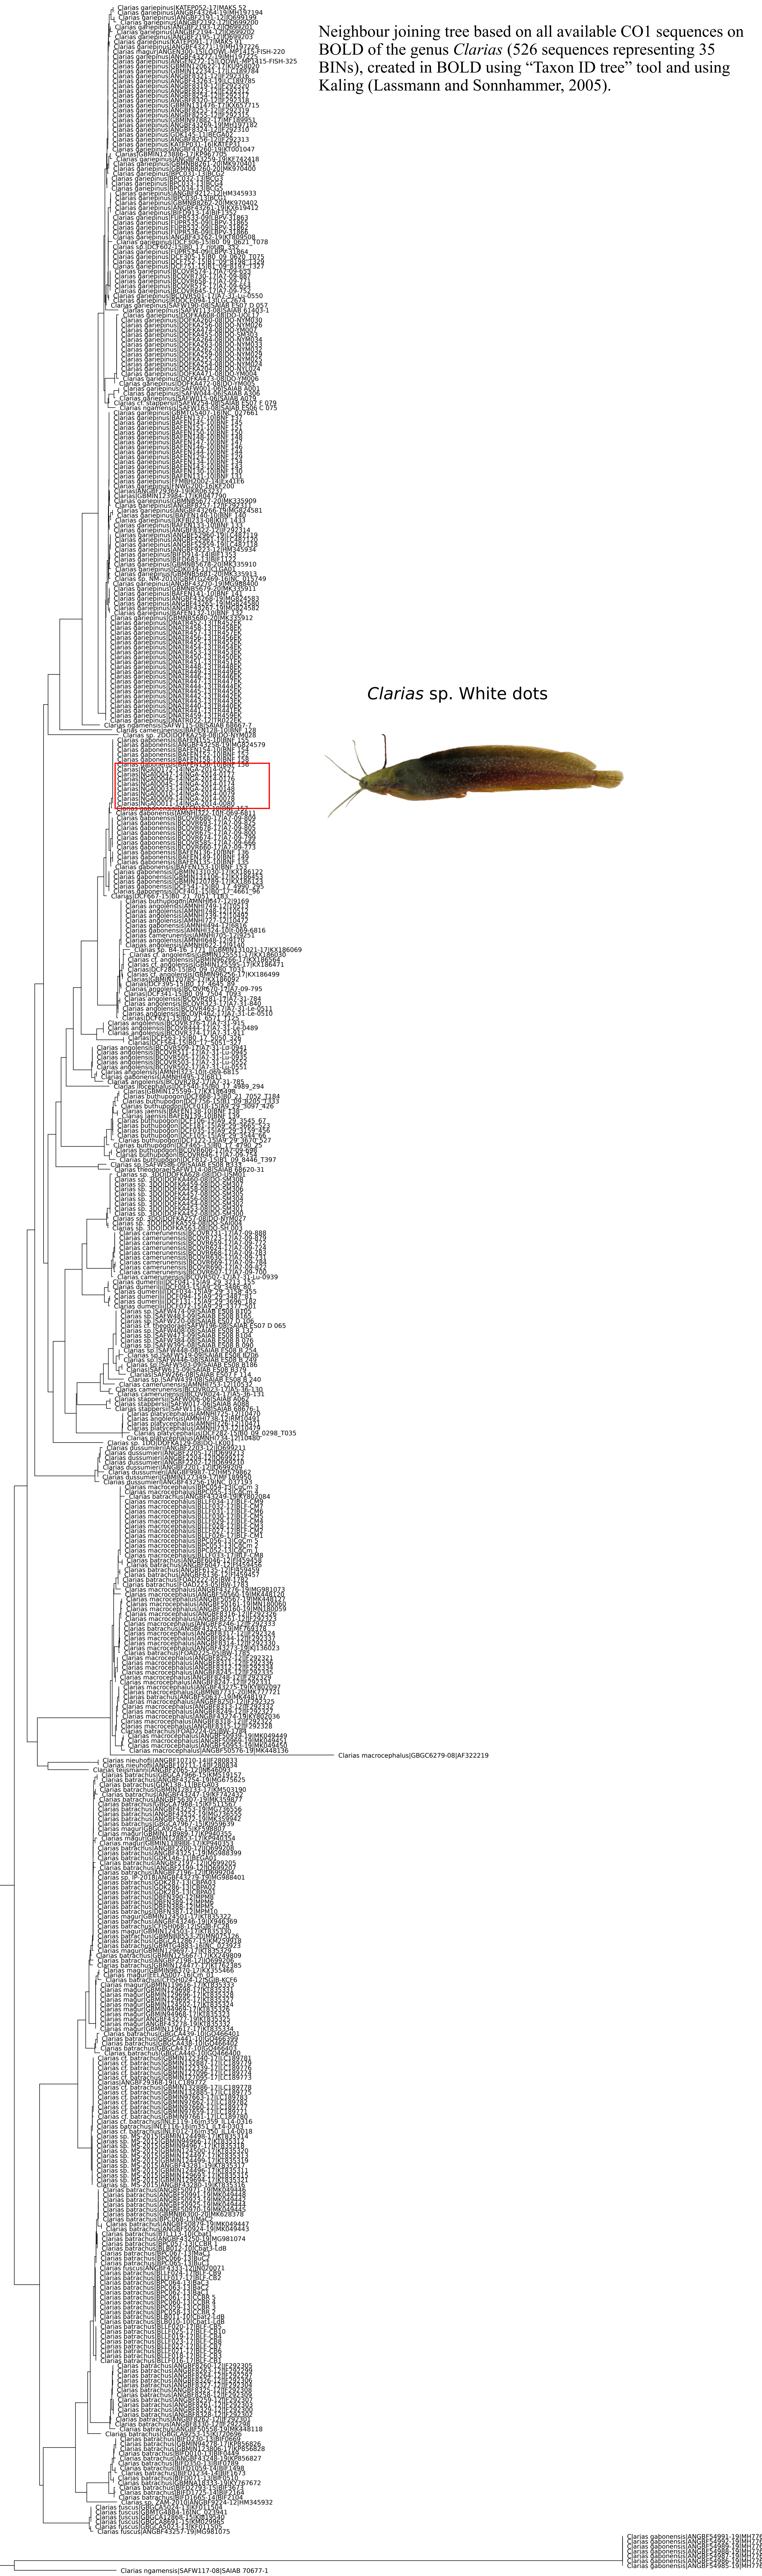

Clarias gabonensis|ANGBF54901-10|MK17766  
 Clarias gabonensis|ANGBF54902-10|MK17766  
 Clarias gabonensis|ANGBF54903-10|MK17766  
 Clarias gabonensis|ANGBF54904-10|MK17766  
 Clarias gabonensis|ANGBF54905-10|MK17766

Clarias ngamensis|SAFW117-08|SAIAB 70677-1
